# Supplementary material
Source: Springer Nature journal article supplement (https://www.springermedizin.de/resource/supplementary/12967_2013_1702_MOESM5_ESM.pdf/9575148)

miRNA Discovery MATRIX 1

miRNA Discovery MATRIX 2

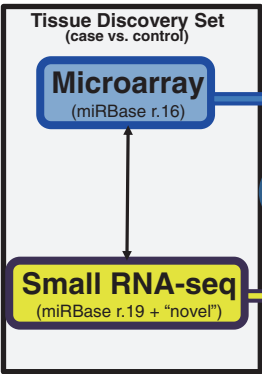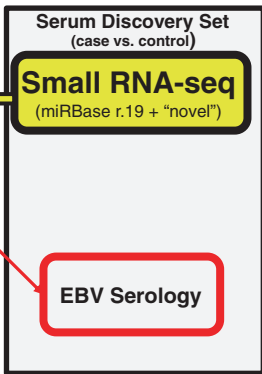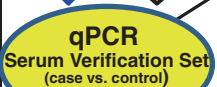

miRNA Verification

Supplement: MOESM5 [file 9575148]
